# Supplementary material for: Stratifying the Shoreline: A Modified OSPAR Framework to Monitor Event-Driven Beach Litter
Source: Research Square preprint supplement (doi:10.21203/rs.3.rs-7767950/v1), 2025-11-11
Supplement: Supplementary file 1 [file 5710a98bc7a49d3a68ec4e30.pdf]

**Figure S1.** Official map of SOMNII 2019 edition, immediately before the first sampling campaign.

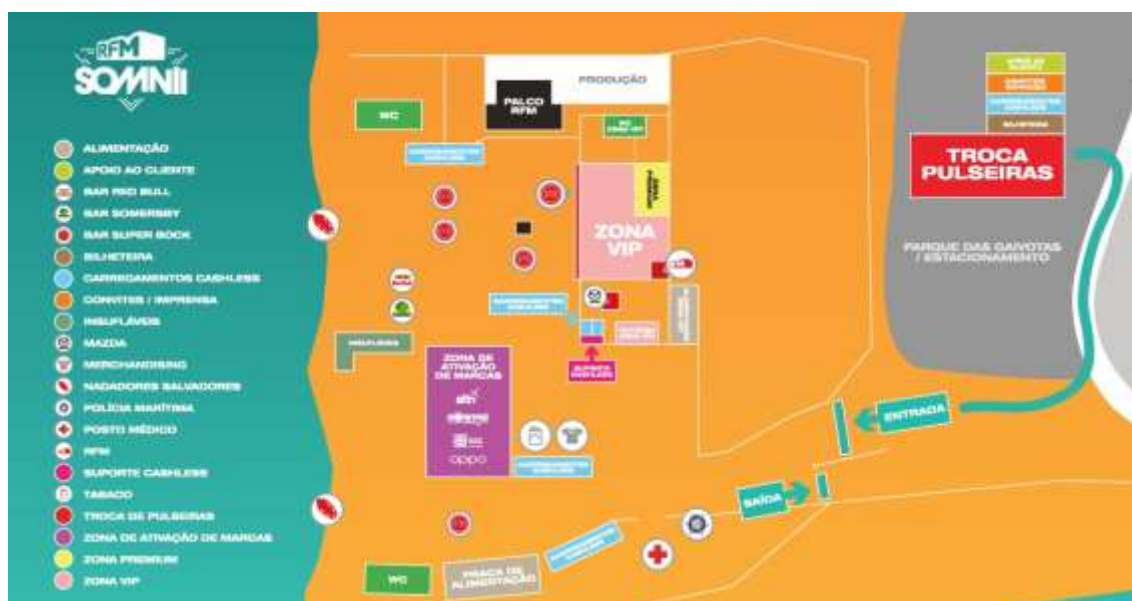

**Figure S2.** Official map of SOMNII 2023 edition, immediately before the last sampling campaign.

## 2. Images of festival zones

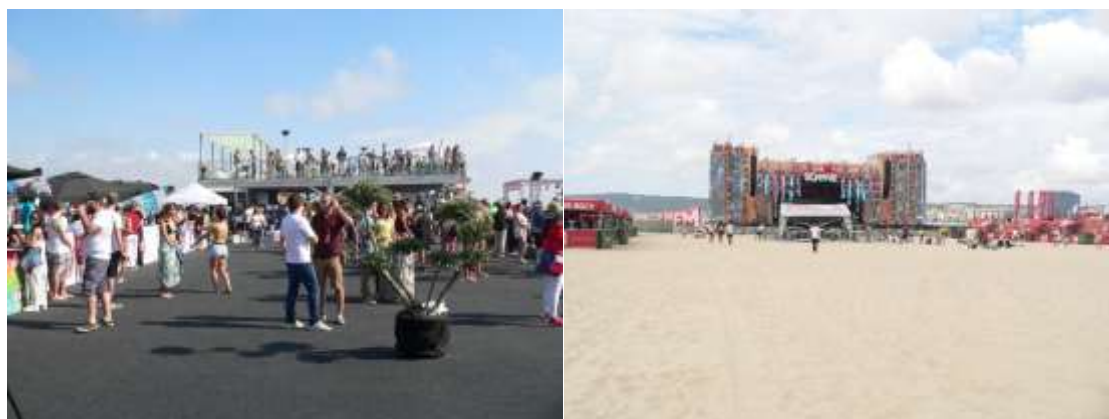

**Figure S3.** Left: VIP zone in 2019, featuring a carpeted floor. Right: STAGE zone in 2019, during the day.

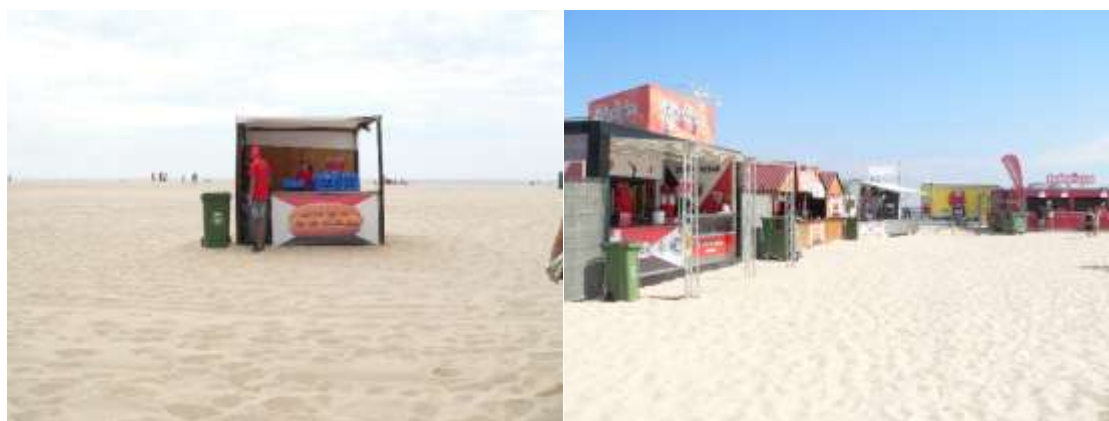

**Figure S4. Left:** Small food tent with CHILLOUT zone behind, in 2019. **Right:** Food court in 2019. Outside the sampling area.

### 3. Example of items left behind by festival participants or staff

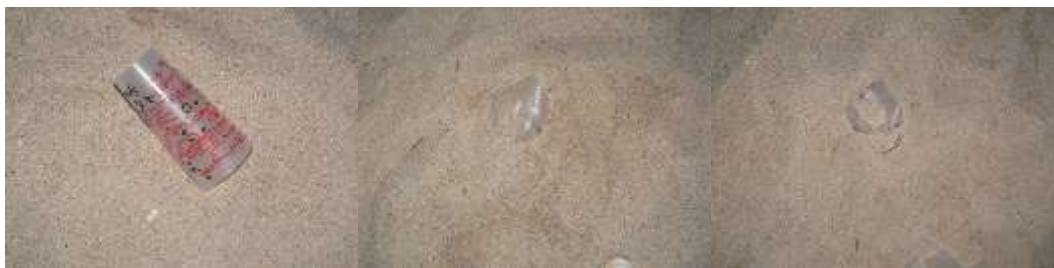

**Figure S5.** Single-use plastic cups.

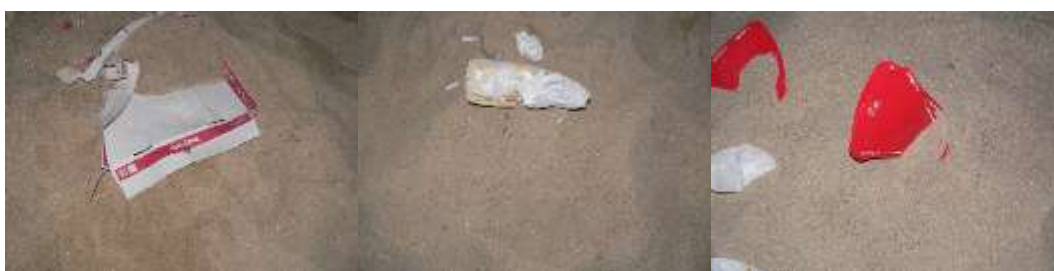

**Figure S6.** Single-use cardboard food containers.

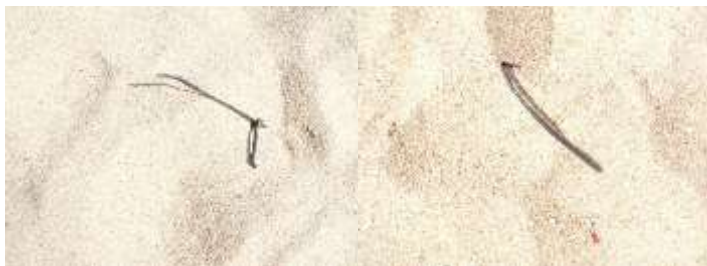

**Figure S7.** Zip ties.

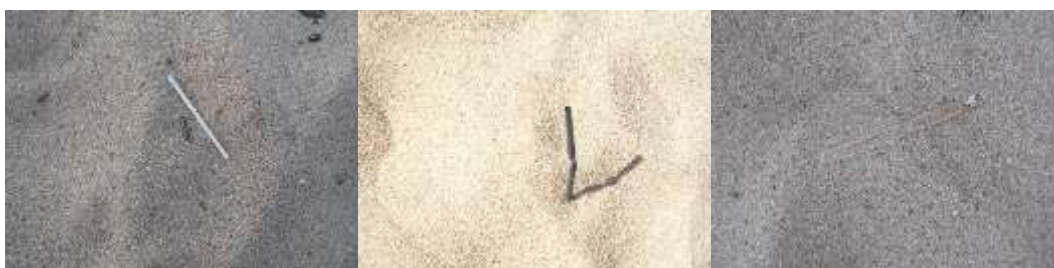

**Figure S8.** Left and Middle: Plastic straws. Right: Plastic coffee stirrer.

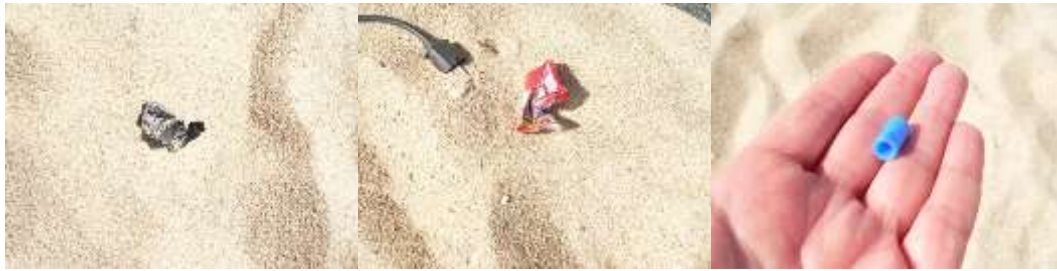

**Figure S9.** Left: Plastic adhesive tape. Middle and right: Electric appliances.

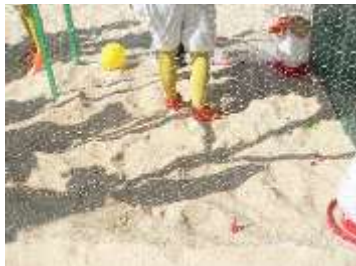

**Figure S10.** Balloons and burst balloons, from an entertainment area.

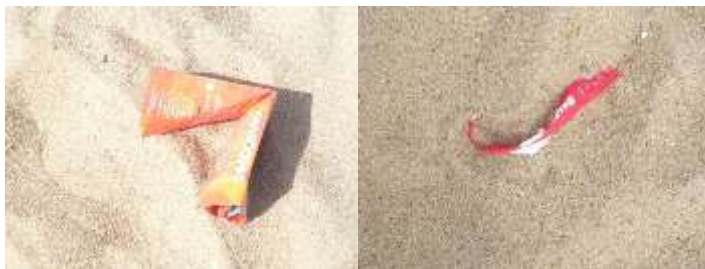

**Figure S11.** Left: Festival programme. Right: Festival Festival wristband

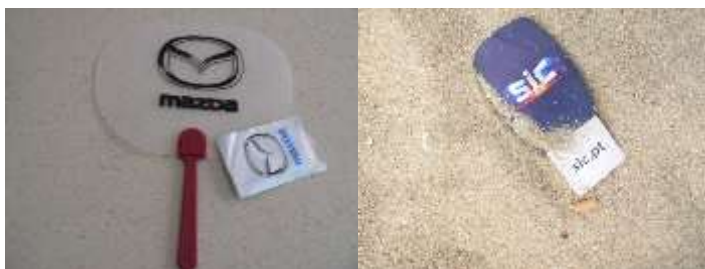

**Figure S12.** Merchandise from sponsoring brands.

#### 4. Images taken during field sampling process



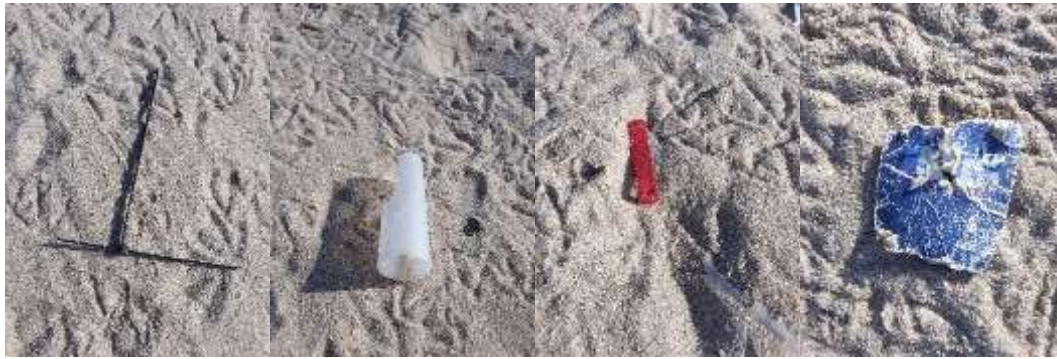

**Figure S13.** Examples of items found and collected during the Summer 2019 field campaign in the STAGE zone. From left to right: a zip tie, a plastic cup, a plastic keg seal, cardboard merchandise.

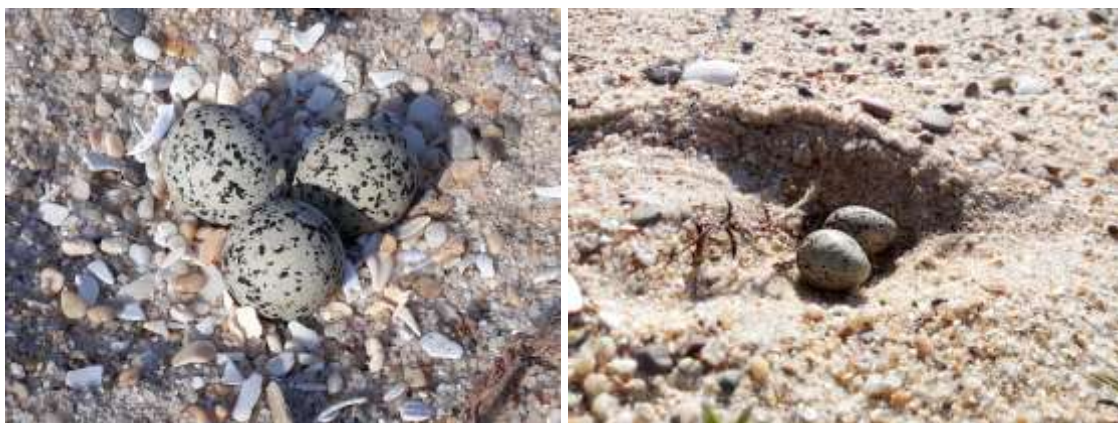

**Figure S14.** *Charadrius alexandrinus* eggs discovered in the VIP sampling zone during the Spring 2020 (left) and Spring 2021 (right) field campaigns (few weeks before the festival).

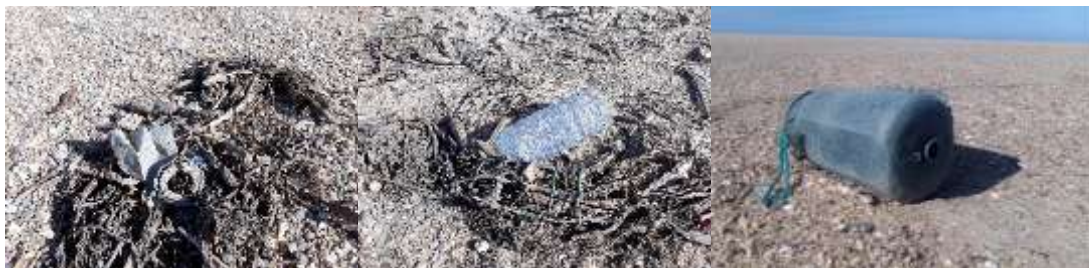

**Figure S15.** Examples of items found and collected during the Winter 2021 field campaign in the CHILLOUT zone.

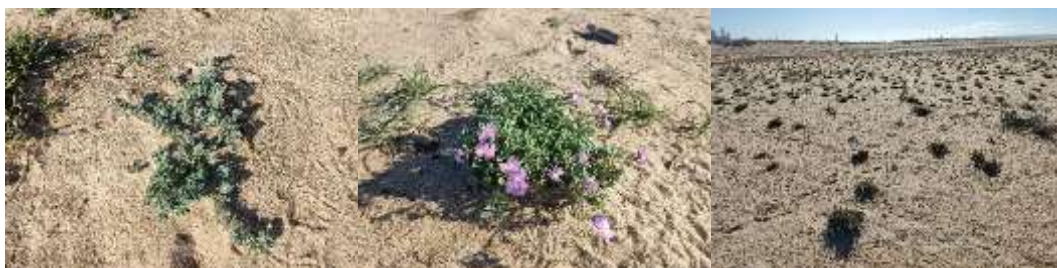

**Figure S16.** Dune vegetation thriving in the festival area during the years when the event was canceled due to COVID-19. Pictures taken during the Autumn 2022 field campaign.

## 5. Items found during the sorting process

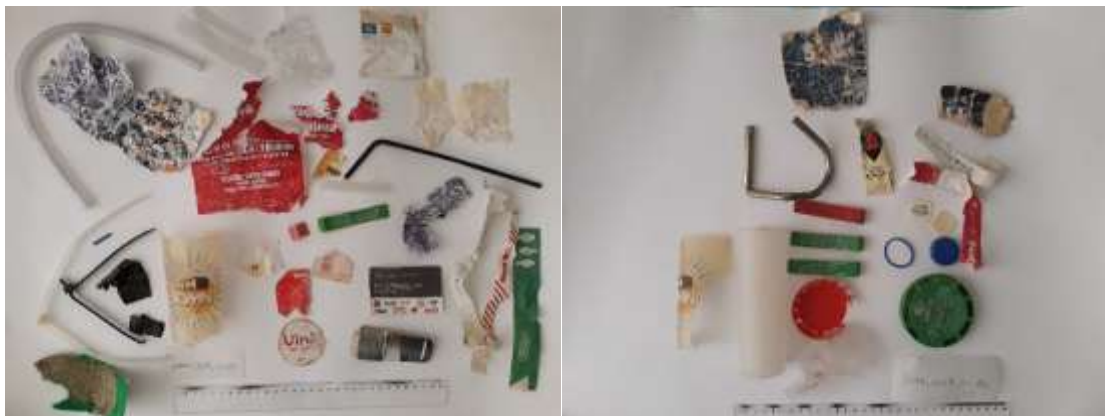

**Figure S17.** Example of items sorted from the Summer 2019 field campaign. Left: VIP Zone. Right: STAGE zone.

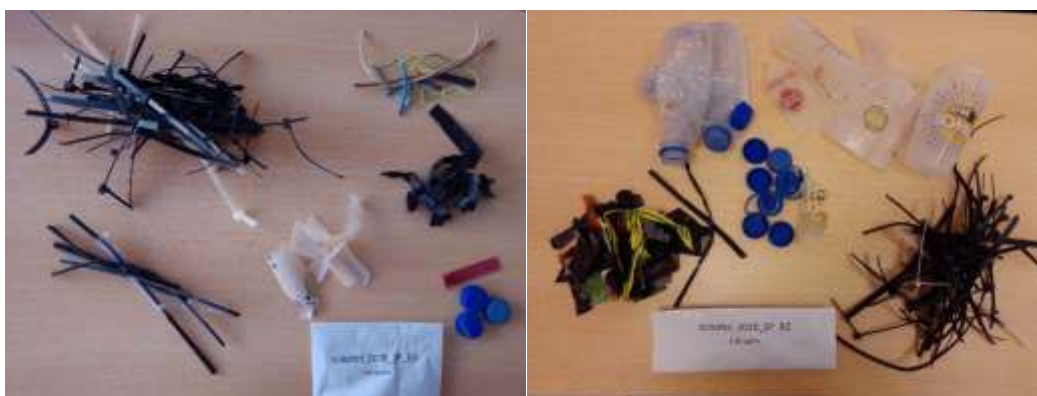

**Figure S18.** Example of items sorted from the Summer 2020 field campaign. Left: VIP Zone. Right: STAGE zone.
